# Supplementary material
Source: Springer Nature journal article supplement (https://www.springermedizin.de/resource/supplementary/12939_2013_433_MOESM1_ESM.pdf/9551158)
Supplement: MOESM1 [file 9551158]

**Individual  
Influences:**

knowledge, attitudes,  
behavior, self-concept  
and skills.

**Interpersonal  
Influences:**

parent  
and peer influences  
and attitudes, and  
characteristics of  
relationships.

**Environmental  
Influences:**

community  
characteristics, media  
influences, legislation  
and policy.
